# Supplementary material for: Siliceous Sandstones Used in Local Khmer Temples in Battambang, Ta Keo, and Kampong Cham Provinces, Cambodia
Source: Preprints.org preprint supplement (doi:10.20944/preprints202312.2282.v1), 2023-12-29
Supplement: Supplementary file 1 [file supplementary]

## Sheet: Pale brown siliceous sandstone
Table S1: Magnetic susceptibilities and chemical compositions determined by pXRF for pale brown siliceous sandstone, red siliceous sandstone, and gray sandstone.
Pale brown siliceous sandstone																					Pale brown siliceous sandstone
	MS (×10-3 SI unit）	P (ppm)	S (ppm)	Cl (ppm)	K (ppm)	Ca (ppm)	Ti (ppm)	V (ppm)	Cr (ppm)	Mn (ppm)	Fe (ppm)	Co (ppm)	Cu (ppm)	Zn (ppm)	Rb (ppm)	Sr (ppm)	Y (ppm)	Zr (ppm)	Pb (ppm)			MS (×10-3 SI unit）	P (ppm)	S (ppm)	Cl (ppm)	K (ppm)	Ca (ppm)	Ti (ppm)	V (ppm)	Cr (ppm)	Mn (ppm)	Fe (ppm)	Co (ppm)	Cu (ppm)	Zn (ppm)	Rb (ppm)	Sr (ppm)	Y (ppm)	Zr (ppm)	Pb (ppm)
Wat Ek Phnom	0.005	<LOD	892	<LOD	<LOD	<LOD	969	23	<LOD	144	5405	<LOD	11	13	11.7	20.1	11.2	74.7	7.7		Ta Prohm of Tonle Bati Outer gallery	0.098	<LOD	949	<LOD	9254	<LOD	1517	19	<LOD	517	15809	7.7	11	95	67.2	27.1	31.4	189	21
	0.028	<LOD	2280	<LOD	1725	7119	1270	34	12	242	14730	4.1	19	35	21.1	178	15.8	144	16			0.043	4100	1142	365	6167	7943	1589	216	157	692	12457	4.7	35	60	65.8	35.5	84.6	93.7	57
	0.032	<LOD	851	<LOD	3071	7289	1670	17	9	286	14574	5.4	23	60	23.1	63.8	21.8	133	9			0.021	995	1286	360	4275	<LOD	1046	<LOD	<LOD	191	7766	1.6	16	100	33.7	11	14.3	115	20
	0.004	3494	295	<LOD	<LOD	6854	1016	<LOD	<LOD	219	8951	<LOD	15	29	7.1	15.5	6.6	42.5	17			0.004	3862	<LOD	122	<LOD	6815	1105	<LOD	<LOD	238	7589	<LOD	15	41	14.4	11.5	7.8	53	19
	0.006	<LOD	266	<LOD	<LOD	6684	738	<LOD	<LOD	165	6100	<LOD	10	42	5.5	20.3	9.3	44.9	10.9			0.117	<LOD	1775	129	4202	<LOD	1091	32	13	780	8252	1.7	21	49	45	18	21.7	116.2	42
	0.006	3044	401	<LOD	<LOD	6747	1061	<LOD	<LOD	290	8621	<LOD	10	69	8.2	143	11.5	64.3	25			0.019	3631	1370	162	5937	7560	1920	50	10	1803	10634	3.2	37	69	44.9	46.9	14.9	108.4	68
	0.041	<LOD	1030	<LOD	<LOD	7285	1235	35	<LOD	221	14984	3.2	13	36	18.6	304	17.9	279	19			0.027	<LOD	1462	115	3225	7776	1541	19	7	1176	12011	1	17	33	47.7	29	14.9	78.9	215
	0.006	954	207	<LOD	<LOD	<LOD	724	<LOD	<LOD	154	5668	<LOD	13	6.3	7.8	16.1	5.2	43.7	5.3			0.036	1779	1696	320	1311	7528	1532	77	29	948	10304	3.1	15	112	40	99	20	118.6	608
	0.015	<LOD	699	<LOD	<LOD	6791	996	<LOD	<LOD	<LOD	5922	<LOD	8	5.3	6.7	13	8.8	64.6	29			0.05	1286	907	<LOD	9661	6986	1900	26	<LOD	1901	14470	4.1	42	75	68.1	25.4	23.6	141	92
	0.038	1646	831	<LOD	<LOD	6760	1030	<LOD	<LOD	422	19904	6.1	12	36	19.8	40.8	14.7	92.9	50			0.097	<LOD	953	785	8460	7316	1905	68	17	1159	15976	5.1	27	160	82.3	32.5	32.2	212	66
Prasat Basset Mandapa Central sanctuary	0.007	<LOD	320	<LOD	3225	7264	1621	21	<LOD	241	7203	<LOD	21	12	27.7	30.3	16.1	147	27		Ta Prohm of Tonle Bati Central sanctuary	0.075	3700	919	584	11974	7193	1728	235	169	1095	19397	12.4	32	380	57.7	17.4	30.9	154	10
	0.019	<LOD	862	<LOD	1069	<LOD	1538	<LOD	<LOD	139	7216	1.3	18	12	26.2	42.1	15.5	168	12			0.074	35041	1889	248	7764	7785	1747	82	14	355	15477	3.8	25	85	59.5	18.2	21.5	140	21
	0.02	32361	986	<LOD	3534	7573	1809	83	35	176	8905	2.2	27	46	29.5	48.5	21.4	243	49			0.056	20768	2625	409	4298	9603	1968	800	322	628	12473	3.6	28	202	38.1	32	52.3	140	42
	0.053	16588	1127	<LOD	2401	7372	1102	12	<LOD	257	13470	2.3	39	52	23.6	26.2	13.1	75.9	21			0.053	21837	3079	303	3072	11520	1591	138	32	1681	10028	1.8	24	137	39.2	98.8	19.1	84.2	124
	0.015	4759	773	<LOD	3276	7187	1919	68	10	303	6153	<LOD	33	27	27.9	33.9	18.8	212	22			0.072	48294	16568	1521	1841	10002	2357	218	36	943	16373	3.2	21	250	63.8	38.3	<LOD	185	3762
	0.051	<LOD	637	<LOD	3311	7514	1795	24	<LOD	229	21183	6.1	32	32	21.2	22.8	14.5	240	25			0.041	5733	1130	<LOD	8293	7974	2208	334	95	620	11970	2.8	20	119	69.1	24.6	35.5	195	15
	0.008	<LOD	933	<LOD	<LOD	7596	1235	43	18	205	6001	1.1	24	24	15.6	42.2	21.7	153	16			0.067	37614	8681	456	<LOD	8099	1212	199	127	831	11212	7.9	25	278	45.9	36.5	49.3	125.8	115
	0.021	<LOD	1301	<LOD	293	7192	1322	<LOD	<LOD	732	10981	3.1	14	29	16.8	24.2	18.4	118.8	19			0.092	12459	3458	268	5293	8133	1970	225	65	544	13275	3	24	179	49.2	26.9	35.7	128.4	1066
	0.027	<LOD	893	<LOD	<LOD	<LOD	765	<LOD	<LOD	150	6689	2.2	18	9	15.5	24.5	16.9	66.6	5.5			0.041	15170	1210	<LOD	6875	7713	2452	100	32	559	11452	4.4	21	245	72.3	34.1	35.3	228	24
	0.059	<LOD	1089	<LOD	<LOD	<LOD	773	283	197	261	7391	3.1	15	35	9.4	27.2	45.7	53.1	19			0.097	12517	665	121	8827	7907	1974	156	39	858	14909	4.7	29	210	65.6	20.5	28.8	201	31
Prasat Basset North tower	0.009	<LOD	3351	<LOD	6105	7638	1661	52	13	162	5893	<LOD	14	33	22.4	256	16.4	172	16		Wat Nokor Bachey Inner enclosure	0.061	<LOD	406	322	7110	<LOD	1278	<LOD	<LOD	188	9741	<LOD	13	9	51.4	17.1	13.9	144	8
	0.009	17886	2740	<LOD	9990	13201	1030	43	17	255	7814	<LOD	12	55	7.5	86.5	13.6	64.7	8.2			0.118	2423	245	<LOD	7219	<LOD	1318	<LOD	<LOD	291	11599	5	15	35	71.4	21.3	17.9	179	4.4
	0.004	<LOD	386	367	7877	6713	1075	<LOD	<LOD	<LOD	5243	<LOD	10	2.8	12.5	58.9	11.2	165	12.7			0.098	6492	641	<LOD	15765	6831	2013	55	<LOD	212	17534	4.6	26	58	89.5	27.4	21.2	202	9
	0.015	<LOD	21552	<LOD	673305	<LOD	420	<LOD	<LOD	<LOD	5091	<LOD	8	8	19.2	51	11.4	82.8	11			0.114	<LOD	297	147	10829	<LOD	1720	12	<LOD	287	13320	6.2	30	37	78.3	33.7	18.4	209	24
	0.003	<LOD	<LOD	147	<LOD	7910	577	<LOD	<LOD	<LOD	5197	<LOD	8	3.2	4.6	21.8	6.9	55.8	12.6			0.092	937	245	187	7430	6784	1329	<LOD	<LOD	251	14803	4.5	17	38	57.3	22.5	18.9	132.5	12
	0.007	<LOD	758	<LOD	<LOD	15651	830	<LOD	<LOD	186	5519	<LOD	14	15	1.7	109.6	6.5	39.9	5.1			0.055	<LOD	<LOD	237	4473	6774	1173	<LOD	<LOD	253	9085	3.4	9	15	51.9	19.7	17.1	147	8
	0.017	3226	354	<LOD	3559	14679	1900	51	20	229	6124	<LOD	13	17	24.5	51.4	13.5	225	9			0.068	<LOD	495	282	6346	<LOD	1336	<LOD	<LOD	140	9039	2.2	10	7	44.2	14.9	17.6	120.4	5.6
	0.013	6197	762	<LOD	1576	24134	745	<LOD	<LOD	339	6554	<LOD	17	29	7.9	23.2	5.2	42.8	3.3			0.05	<LOD	494	302	4806	<LOD	1061	<LOD	<LOD	274	7703	1.1	13	6	48.9	15	12.4	149	11
	0.013	<LOD	1595	486	<LOD	11646	771	<LOD	<LOD	174	7483	<LOD	13	11	7.1	25.6	22.6	41.5	3.8			0.068	<LOD	270	339	3943	6839	1405	<LOD	<LOD	393	9116	1.6	12	10	46.8	16.6	14.5	123.8	6
	0.018	<LOD	7042	498	10490	10358	1315	<LOD	82	161	7641	<LOD	14	34	14.7	94.3	7.7	104.8	2.4			0.043	2030	226	103	3782	<LOD	1328	<LOD	<LOD	159	7867	<LOD	11	23	45.5	15.3	18.3	139.7	2.9
Phnom Banon	0.004	<LOD	<LOD	<LOD	<LOD	<LOD	795	<LOD	<LOD	145	5636	<LOD	8	12	7	55.5	13.4	84.8	10		Wat Nokor Bachey Inner gallery	0.141	2934	239	114	10298	<LOD	1904	27	9	378	15733	7.9	21	66	74.2	33.5	29.1	200	53
	0.009	<LOD	774	<LOD	<LOD	<LOD	788	<LOD	<LOD	137	5068	<LOD	13	5.3	3.1	22.3	6.2	65.8	3.2			0.1	1306	194	118	8891	<LOD	1551	15	<LOD	153	9709	2.7	28	19	70.5	18.8	16.9	188	39
	0.012	<LOD	1272	951	<LOD	6773	747	<LOD	<LOD	150	5627	<LOD	8	14	3.8	11	5.9	43.8	6.2			0.089	<LOD	1377	239	2460	<LOD	1219	<LOD	<LOD	195	9066	3.1	11	14	42.7	15.6	13.1	122.9	25
	0.026	<LOD	627	<LOD	<LOD	<LOD	992	<LOD	<LOD	173	9889	2.9	15	23	23.3	63.8	15.4	84.8	12			0.116	3269	673	155	11046	<LOD	1878	42	<LOD	170	10270	3.6	25	33	80.6	30	19.1	193	93
	0.015	2173	603	<LOD	<LOD	6942	985	8	<LOD	256	9755	2.4	16	33	9.3	15	15.6	55.6	21			0.075	943	<LOD	474	8931	<LOD	1027	<LOD	<LOD	233	13424	4	15	21	65.5	20.2	15.9	77.4	7.5
	0.024	1711	682	<LOD	786	7215	1561	52	<LOD	292	14876	2	19	108	24.6	34.5	20.7	121.7	38			0.064	<LOD	439	<LOD	4418	<LOD	1363	<LOD	<LOD	200	8340	3.1	10	9	51.2	15.9	20	158	3.4
	0.023	<LOD	839	<LOD	714	<LOD	1284	11	9	1260	7097	2.3	7	11	22	21.7	13.8	145	18			0.1	<LOD	606	198	4165	<LOD	1427	<LOD	<LOD	350	12355	3.3	15	30	45.3	15.6	16.9	173	10
	0.038	<LOD	753	168	<LOD	7320	1280	<LOD	<LOD	1026	9275	1.4	12	8.5	8.9	16.6	8.3	107.4	24			0.108	<LOD	377	1084	8778	6938	1991	<LOD	7	283	14608	2.8	25	24	72.6	19.9	19.2	170	16
	0.023	<LOD	1237	309	<LOD	14860	1163	<LOD	<LOD	378	9032	<LOD	24	17	11.1	14.3	10.1	94.5	10			0.068	1124	246	219	2360	<LOD	959	<LOD	<LOD	181	7502	1.3	12	4.9	37.9	20.6	12.8	112.6	11.4
	0.019	<LOD	9407	427	<LOD	21234	1156	14	16	2402	10736	<LOD	20	42	9.5	45.3	64	78.4	25			0.093	<LOD	494	192	3867	<LOD	1175	<LOD	<LOD	240	10878	5.7	18	65	59.9	26	27.1	159	9
Phnom Chisor Gallery	0.008	898	597	139	<LOD	<LOD	860	<LOD	<LOD	140	7064	2.1	13	5.8	7.9	27.6	8.6	46.4	7.9		Wat Nokor Bachey Central sanctuary	0.094	<LOD	301	187	9386	7761	1573	<LOD	<LOD	500	11364	4.4	28	36	69.4	31.3	18.9	182	61
	0.009	<LOD	4518	81	<LOD	7065	707	<LOD	22	843	6858	3.2	12	45	8.6	37.2	12	60.9	9.4			0.094	20790	1245	165	5474	9821	1571	31	9	620	12283	3.3	25	105	52.5	94.2	19.8	164	37
	0.026	<LOD	3120	260	4426	10899	1960	91	22	270	11641	<LOD	23	37	18	294	12.6	91.8	30			0.075	8375	9481	130	15550	7842	1075	39	9	420	12933	1.5	50	84	54.5	130	16.6	102.1	19
	0.046	<LOD	1501	388	<LOD	7937	1060	27	<LOD	168	8467	<LOD	43	23	8.8	35.6	12.3	109.6	33			0.086	15423	1139	<LOD	10078	8042	1687	112	52	435	12937	1.5	25	109	61	63.7	40.6	138	44
	0.016	<LOD	1244	<LOD	228	7496	1650	33	<LOD	1135	10035	<LOD	9	37	17.3	23	10.8	80.2	27			0.1	14901	1651	336	9971	9424	1656	53	<LOD	933	14866	2.6	45	197	66.6	71.7	41.5	219	16
	0.025	7299	392	<LOD	<LOD	6995	580	<LOD	<LOD	148	6707	<LOD	11	34	4.4	61.2	7.7	38.6	17			0.095	45307	7041	222	22605	7843	2088	98	16	572	16247	5.4	47	182	77.3	111.4	22.2	246	40
	0.015	1917	980	<LOD	<LOD	<LOD	625	<LOD	33	150	6285	<LOD	<LOD	55	4.5	25.2	8.7	28.7	133			0.099	11650	631	199	8216	7996	1782	21	7	1573	16151	1.5	44	54	70	45.7	86.8	178	96
	0.018	<LOD	5931	397	454	7970	891	<LOD	<LOD	267	7146	1.7	8	85	9	94	11.8	67.2	6.2			0.096	7066	342	130	9530	8765	1642	<LOD	27	1130	16226	6.2	31	358	74.5	71.8	21.1	190	17
	0.016	<LOD	<LOD	<LOD	<LOD	<LOD	1347	10	<LOD	144	5925	<LOD	9	3.6	4.4	22.8	9.8	105	15			0.095	110033	5514	1134	33274	17273	1990	162	52	2639	27445	<LOD	77	726	66.3	224	20.3	205	189
	0.034	2776	398	<LOD	2863	7038	1341	103	38	493	9177	3	11	39	40.3	37.9	36.6	131.2	9.7			0.092	62269	3353	533	17618	16927	2608	267	43	3356	19836	<LOD	28	840	55.1	197	46.5	151	101
Phnom Chisor Sanctuaries	0.034	4376	1829	405	<LOD	6994	735	<LOD	<LOD	143	5351	<LOD	15	21	3.8	48.8	8.4	57.9	11
	0.003	<LOD	4947	1362	3318	7435	1504	73	11	260	8845	<LOD	38	107	7.1	219	12.5	79.7	167
	0.005	<LOD	902	103	<LOD	6764	703	<LOD	<LOD	169	5470	<LOD	8	24	5.9	28.4	11.6	93	9.1
	0.021	<LOD	1295	115	<LOD	9026	809	<LOD	<LOD	148	8416	1.5	21	27	8.9	42.8	12.4	152	9.1
	0.018	2415	<LOD	<LOD	<LOD	6729	843	<LOD	<LOD	159	8699	1.8	11	26	5.8	44.8	13.2	82.9	18
	0.006	1586	672	<LOD	<LOD	<LOD	1053	<LOD	<LOD	237	8601	3.1	15	42	5	27.7	10.1	126.2	16
	0.004	1057	403	91	<LOD	<LOD	719	<LOD	<LOD	135	5132	<LOD	9	54	4.6	21.5	7	42.2	28
	0.011	969	787	<LOD	<LOD	6702	1101	14	<LOD	152	5967	<LOD	9	62	4.7	32.4	9.9	68.8	18
	0.011	<LOD	764	<LOD	<LOD	6949	991	47	<LOD	155	5656	<LOD	6	16	2.7	23.4	8.6	67.7	18
	0.016	2643	4228	496	<LOD	7613	783	8	<LOD	143	7825	1.3	66	65	5.5	42.9	10.3	53.2	8.3

## Sheet: Red siliceous sandstone
Table S1: Magnetic susceptibilities and chemical compositions determined by pXRF for pale brown siliceous sandstone, red siliceous sandstone, and gray sandstone.
Red siliceous sandstone
	MS (×10-3 SI unit）	P (ppm)	S (ppm)	Cl (ppm)	K (ppm)	Ca (ppm)	Ti (ppm)	V (ppm)	Cr (ppm)	Mn (ppm)	Fe (ppm)	Co (ppm)	Cu (ppm)	Zn (ppm)	Rb (ppm)	Sr (ppm)	Y (ppm)	Zr (ppm)	Pb (ppm)
Wat Ek Phnom	0.05	<LOD	6878	<LOD	2978	8827	4635	163	52	332	34848	18	29	83	25.3	232	15.2	387	19
	0.075	2419	5009	<LOD	1856	7133	6640	361	129	1105	49717	15	36	28	21.1	364	38.6	410	28
	0.055	<LOD	727	<LOD	<LOD	<LOD	2592	82	29	206	20952	12.3	14	43	21.7	308	20.8	177	28
	0.056	3227	964	<LOD	2691	7194	3484	163	71	216	30663	10.7	19	43	28	402	18.3	222	34
	0.053	<LOD	1028	<LOD	<LOD	<LOD	4539	70	42	309	25674	17.2	24	23	22	197	19.2	347	30
	0.053	<LOD	1766	<LOD	439	6698	6207	128	35	201	32026	19	23	14	22.1	209	37.8	705	19
	0.061	<LOD	1321	<LOD	<LOD	<LOD	2545	80	23	241	21375	13.6	16	40	20.8	299	19.1	164	28
	0.057	<LOD	1850	155	2319	6992	3854	203	68	1417	37950	11	15	21	23.5	462	12.9	146	54
	0.07	<LOD	3732	1352	6110	11467	3441	88	37	7987	29582	<LOD	26	233	24.7	235	20.1	344	87
	0.057	<LOD	4436	1943	6496	23574	3655	223	75	3893	36407	21	55	793	23.2	313	42.3	410	73
Prasat Basset	0.059	<LOD	824	<LOD	1973	7967	3847	149	42	745	28765	14.4	36	82	22.4	320	28.6	310	348
	0.045	<LOD	1231	<LOD	2389	8016	3126	211	70	1045	24842	9.7	89	66	21.3	420	34.7	146	313
	0.039	<LOD	1281	<LOD	2114	7058	3687	178	47	852	24879	6.7	15	43	22	310	13.6	217	66
	0.036	<LOD	8032	<LOD	7967	7550	2703	167	72	368	19798	7.8	170	53	18.4	327	11.6	177	42
	0.033	2050	3305	<LOD	3717	10069	1906	28	10	293	12169	3.2	45	30	19.9	92.6	16.2	285	8.1
	0.049	1397	1610	<LOD	2836	8437	1494	94	30	511	16905	4.4	54	52	23.1	46.1	39.6	138	23
	0.051	<LOD	1443	<LOD	2851	8720	3492	101	29	628	20763	8.5	14	47	20.3	232	16.1	237	32
	0.055	<LOD	1753	<LOD	2956	8415	3271	105	37	334	23675	13.1	19	58	23.6	299	26.7	207	27
	0.049	<LOD	873	<LOD	2632	8223	2825	139	62	482	28312	16	18	29	21	409	29.2	302	55
	0.034	<LOD	760	<LOD	1878	7564	2815	99	35	359	18890	8.7	14	10	22.5	292	21.5	112	54
Phnom Banon	0.023	<LOD	350	<LOD	1139	9047	2499	15	21	765	17023	7.5	15	23	22	195	16.6	170	30
	0.038	<LOD	<LOD	<LOD	1717	8952	2265	28	13	523	18005	10.4	22	23	22.5	194	16	173	18
	0.058	14598	470	<LOD	1107	9562	2323	169	65	336	27748	14.7	51	73	17	259	21.9	168	45
	0.066	1260	803	<LOD	677	7927	4540	157	56	4783	28668	13.2	28	163	19.8	341	42.3	261	59
	0.06	<LOD	1451	<LOD	839	12309	3298	107	39	2006	24879	12.4	16	73	21.4	243	35.9	290	38
	0.052	9375	1384	<LOD	<LOD	6694	3417	76	20	287	22525	13.5	29	74	20.2	325	18.4	315	49
	0.048	<LOD	1241	<LOD	<LOD	6928	2900	24	35	214	20384	14.3	39	59	21.5	297	17.6	283	35
	0.072	<LOD	343	<LOD	879	7147	3052	28	13	200	23756	14.1	15	23	20.3	291	19	245	31
	0.054	<LOD	354	389	1287	9827	2836	66	36	1465	23258	10.1	27	38	19	279	21	215	25
	0.064	<LOD	2095	149	279	9286	2505	47	23	2306	23430	3.2	24	46	17.4	232	17	192	36

## Sheet: Gray sandstone
Table S1: Magnetic susceptibilities and chemical compositions determined by pXRF for pale brown siliceous sandstone, red siliceous sandstone, and gray sandstone.
Gray sandstone
	MS（×10-3 SI unit）	P (ppm)	S (ppm)	Cl (ppm)	K (ppm)	Ca (ppm)	Ti (ppm)	V (ppm)	Cr (ppm)	Mn (ppm)	Fe (ppm)	Co (ppm)	Cu (ppm)	Zn (ppm)	Rb (ppm)	Sr (ppm)	Y (ppm)	Zr (ppm)	Pb (ppm)
Wat Ek Phnom	2.98	<LOD	2310	799	17577	11711	2779	88	20	1139	22105	9.5	14	52	67	204	19	224	15
	5.49	<LOD	1043	<LOD	17757	10315	3371	95	24	594	27026	11.4	15	57	66.7	213	20.5	318	16
	3.28	<LOD	1981	<LOD	17128	12821	2037	83	16	479	20672	8.2	17	42	63.8	205	19.6	196	15
	3.93	<LOD	1849	<LOD	17467	10038	2615	84	22	477	25397	7.9	14	55	65.5	208	20.7	232	10
	7.82	<LOD	1828	<LOD	15981	10571	3086	106	27	592	24917	12	19	43	60.3	220	21.2	329	15
	4.29	<LOD	589	<LOD	17053	10130	3109	62	46	657	23241	10.7	16	46	61.8	214	21.9	188	13
	5.53	<LOD	2821	<LOD	16827	10337	2566	97	31	996	25307	9.9	11	47	63.9	213	23.1	251	11
	3.97	<LOD	2669	1284	10903	8458	1991	49	24	426	22452	10.4	10	59	58.7	198	17.5	179	12
	4.12	<LOD	1646	688	16026	10018	2611	71	30	521	23994	10.6	19	48	62.1	215	20	258	14
	6.4	<LOD	2112	360	16641	10027	3510	91	48	683	31936	14.3	17	61	65.2	217	24.5	403	11
Phnom Chisor	1.46	<LOD	1168	<LOD	17901	22672	2906	119	25	684	27897	13.5	17	95	71.1	199	23.4	240	9
	1.44	<LOD	1695	<LOD	15845	31214	2781	109	27	561	25175	10	14	58	67.9	169	19.9	212	13
	2.89	<LOD	765	<LOD	19922	10103	2708	79	12	541	25529	13.4	13	56	69.1	178	17.5	236	14
	1.97	<LOD	5435	260	17846	23438	2883	93	23	537	25096	11.2	15	50	62.5	177	19.3	235	12
	1.56	<LOD	1489	<LOD	19290	10428	2614	87	24	515	26627	11.4	14	63	68.9	180	20.5	241	12
	1.6	<LOD	3419	<LOD	17326	11669	2348	56	42	469	24845	13.6	12	60	108.5	168	18.7	219	19

## Sheet: Phra Wihan
Table S1: Magnetic susceptibilities and chemical compositions determined by pXRF for pale brown siliceous sandstone, red siliceous sandstone, and gray sandstone.
Pale brown siliceous sandstone used in the Preah Vihear temple (Phra Wihan Formation)																							Pale brown siliceous sandstone used in the Preah Vihear temple (Phra Wihan Formation)
Places		Color	MS（×10-3 SI unit）	P (ppm)	S (ppm)	Cl (ppm)	K (ppm)	Ca (ppm)	Ti (ppm)	V (ppm)	Cr (ppm)	Mn (ppm)	Fe (ppm)	Co (ppm)	Cu (ppm)	Zn (ppm)	Rb (ppm)	Sr (ppm)	Y (ppm)	Zr (ppm)	Pb (ppm)		Places		Color	MS（×10-3 SI unit）	P (ppm)	S (ppm)	Cl (ppm)	K (ppm)	Ca (ppm)	Ti (ppm)	V (ppm)	Cr (ppm)	Mn (ppm)	Fe (ppm)	Co (ppm)	Cu (ppm)	Zn (ppm)	Rb (ppm)	Sr (ppm)	Y (ppm)	Zr (ppm)	Pb (ppm)
Preah Vihear	Building A	Brown	0.02	<LOD	25336	1151	13516	6480	921	66	46	270	8027	75	309	115	18.2	53.6	19.5	68.8	5.7		Preah Vihear	Building K1	Brown	0.053	<LOD	1240	<LOD	8341	6095	1461	49	20	235	13688	12	12	43	51.1	21.5	27	94.4	7.9
Preah Vihear	Building A	Brown	0.02	<LOD	563	3138	1127	6186	1370	94	24	234	8484	21	23	29.5	21.4	23.9	13.3	87.8	3.9		Preah Vihear	Building K1	Brown	0.053	<LOD	588	270	7826	6433	1502	45	23	180	13854	16	26	43	40.1	19.5	10.7	151	3.7
Preah Vihear	Building A	Brown	0.02	<LOD	1002	215	1044	6122	1274	95	29	161	7848	<LOD	9	10.8	14	28.4	8.4	59	10.3		Preah Vihear	Building K1	Brown	0.053	<LOD	627	72	6264	6263	1506	27	25	169	10497	6	11	20.1	48.9	23.3	15.9	170	3.3
Preah Vihear	Building A	Brown	0.02	845	858	<LOD	417	6083	1020	110	21	149	6954	26	24	20.7	12.5	17.2	37.7	64.3	11		Preah Vihear	Building K1	Brown	0.053	1127	695	<LOD	4161	6152	1289	<LOD	11	159	13144	<LOD	21	21.9	34.7	16.3	19.4	160	3.8
Preah Vihear	Building A	Brown	0.02	<LOD	698	74	2664	6126	1100	9	13	138	6619	13	27	11.6	23	15.5	12.8	62.5	6.3		Preah Vihear	Building K1	Brown	0.053	<LOD	401	202	6318	6141	1330	<LOD	16	166	10969	<LOD	17	21.4	40.9	17	12.5	131.5	4.7
Preah Vihear	Building B	Brown	0.034	<LOD	3602	2089	8131	8996	1384	15	26	429	9560	11	33	108	21.3	15.8	11.3	61.8	27		Preah Vihear	Building K2	Brown	0.031	<LOD	1114	94	2515	6189	930	<LOD	11	197	9035	7	14	23.1	31.8	20.3	12.1	76.9	8
Preah Vihear	Building B	Brown	0.034	<LOD	2410	547	6576	6925	1546	32	21	498	10370	15	12	20.1	41.8	19.8	13.8	104.7	7.6		Preah Vihear	Building K2	Brown	0.031	<LOD	511	<LOD	1238	6129	771	<LOD	12	145	7646	8	16	26.5	14.3	12.3	10.1	53.5	4.1
Preah Vihear	Building B	Brown	0.034	<LOD	1122	554	2352	6823	1217	<LOD	8	279	9162	<LOD	25	19.5	27.4	14.5	10.4	66.1	9.3		Preah Vihear	Building K2	Brown	0.031	<LOD	699	105	3567	6138	1096	<LOD	27	159	9421	21	25	28	26.8	20.4	14.1	86.4	4.3
Preah Vihear	Building B	Brown	0.034	<LOD	1561	216	3263	6221	926	30	26	170	8137	18	15	25.4	23.2	17.5	10.4	64.3	369		Preah Vihear	Building K2	Brown	0.031	<LOD	1416	<LOD	2523	6229	856	14	22	154	10993	<LOD	10	27	24.4	28	12.1	71	6.5
Preah Vihear	Building B	Brown	0.034	<LOD	1770	253	2259	7447	1091	38	30	236	9372	26	49	33	21.8	17.1	17.4	120.9	7.2		Preah Vihear	Building K2	Brown	0.031	<LOD	316	<LOD	802	6250	714	<LOD	4	142	7493	<LOD	10	20.8	14.9	14.1	11	63	7.2
Preah Vihear	Building C	Brown	0.068	<LOD	2086	3138	3748	12211	1105	<LOD	18	237	10913	<LOD	35	47	41.2	19.8	12.4	125.9	16		Preah Vihear	Building L	Brown	0.059	<LOD	820	399	7841	6215	1646	44	37	189	11943	9	35	39	50.8	20.1	14.7	90.2	6.8
Preah Vihear	Building C	Brown	0.068	<LOD	1488	160	6848	6497	1302	30	29	358	10768	15	16	39	42.6	25.6	28	125.6	75		Preah Vihear	Building L	Brown	0.059	<LOD	1071	100	7779	6124	1485	10	21	145	11227	20	34	36	40.2	22.3	14.2	103.4	5.4
Preah Vihear	Building C	Brown	0.068	<LOD	1203	121	7475	6795	1362	12	20	526	10309	<LOD	12	25	40.6	18.4	17.5	106.1	94		Preah Vihear	Building L	Brown	0.059	<LOD	176	<LOD	4030	5991	1170	<LOD	60	201	11020	10	11	24.2	29.7	15.5	12.8	110.1	7.8
Preah Vihear	Building C	Brown	0.068	<LOD	2293	177	8615	7015	1435	<LOD	25	710	12621	<LOD	16	43	50.1	20.4	11.6	110.1	31		Preah Vihear	Building L	Brown	0.059	<LOD	1052	<LOD	6928	5990	1196	<LOD	20	192	12708	10	9	30.9	39.9	18.8	18.1	73.2	7
Preah Vihear	Building C	Brown	0.068	4927	1453	184	6001	6762	1455	882	622	448	10668	53	29	101	34.8	20.8	192	72.2	185		Preah Vihear	Building L	Brown	0.059	<LOD	<LOD	<LOD	5721	6125	1368	16	23	169	11852	25	48	49	37.3	16.6	21.1	84	7.7
Preah Vihear	Building D	Brown	0.03	3277	918	<LOD	1366	6316	948	119	83	279	8310	12	13	81	16.2	12.1	69.2	84.2	19.3		Preah Vihear	Building N1	Brown	0.053	<LOD	268	127	6331	6439	1834	423	65	199	10829	21	13	43	37.5	22.7	19.6	87.2	6.3
Preah Vihear	Building D	Brown	0.03	1191	931	108	687	6732	871	32	28	831	7199	20	15	33	12.1	18.3	15.4	47.3	17		Preah Vihear	Building N1	Brown	0.053	<LOD	1532	<LOD	3366	6166	1076	77	21	193	9517	44	12	44	23.5	24.5	12.1	65.7	4
Preah Vihear	Building D	Brown	0.03	1364	1716	110	3117	6820	1070	6	34	199	8002	15	24	59	23	46.2	41.9	67.3	10.4		Preah Vihear	Building N1	Brown	0.053	<LOD	1366	94	6257	6088	1228	<LOD	26	177	10650	11	13	23.9	36.9	15.3	11.6	95.5	3.7
Preah Vihear	Building D	Brown	0.03	<LOD	2781	431	1737	6248	1154	<LOD	13	149	8117	19	16	47	23.9	15.2	13.5	65	5.7		Preah Vihear	Building N1	Brown	0.053	<LOD	381	<LOD	7559	6190	1541	<LOD	24	159	11471	12	13	19	41.4	16.5	16.3	96.6	3.2
Preah Vihear	Building D	Brown	0.03	1514	9868	485	7069	6191	946	42	31	224	9941	126	85	110	25.8	48.3	10	55.9	12.2		Preah Vihear	Building N1	Brown	0.053	<LOD	1840	<LOD	4041	6158	1889	71	41	173	10406	19	15	41	26	19.5	16.9	161	9.6
Preah Vihear	Building D	Brown	0.035	4280	18784	125	19149	6629	1478	46	34	343	13565	14	26	218	43.6	52.9	19.6	156	56		Preah Vihear	Building O1	Brown	0.053	<LOD	2777	119	4106	6550	1035	<LOD	9	529	9111	<LOD	8	23.4	35.6	15.3	27.4	67.1	2.8
Preah Vihear	Building D	Brown	0.035	<LOD	16840	158	16906	6549	1448	16	38	184	9200	13	20	112	31.3	32.3	10.4	81.5	7.3		Preah Vihear	Building O1	Brown	0.053	<LOD	987	107	1637	6318	887	<LOD	15	173	7936	7	18	13.5	26	13.4	12.8	72.6	3.8
Preah Vihear	Building D	Brown	0.035	<LOD	2477	5545	11823	6883	1623	55	34	152	11312	18	12	17.6	37.3	23.5	12.9	98.8	7.6		Preah Vihear	Building O1	Brown	0.053	<LOD	12777	222	9016	6312	1107	43	22	156	9763	12	29	33	30.7	48.6	18.2	85.3	8.1
Preah Vihear	Building D	Brown	0.035	<LOD	9146	5070	9011	7550	1072	28	33	252	9706	8	10	17.1	23	24.7	10.1	67.3	6.4		Preah Vihear	Building O1	Brown	0.053	<LOD	6038	146	4517	6454	814	36	47	143	6865	12	29	12.5	14.2	22.3	10.6	50.1	9.5
Preah Vihear	Building D	Brown	0.035	3089	2502	117	7284	7633	1201	8	25	291	11848	6	44	46	32.1	16.5	10.2	65.7	8.6		Preah Vihear	Building O1	Brown	0.053	<LOD	3402	161	5105	6123	980	32	25	152	9484	8	12	22.7	29.7	26.5	14.6	86	11.1
Preah Vihear	Building E	Brown	0.031	<LOD	862	205	2292	6451	857	<LOD	20	153	9378	11	7	24	21.2	17	12.9	81.9	4.2		Preah Vihear	Building O2	Brown	0.04	<LOD	1423	<LOD	6638	6157	1089	<LOD	22	437	10870	18	4	38	39.9	17.4	20.2	67.9	3
Preah Vihear	Building E	Brown	0.031	<LOD	586	206	4388	6479	1430	26	19	150	8131	15	8	22.2	22.9	19.7	12.9	67.5	5.5		Preah Vihear	Building O2	Brown	0.04	<LOD	1594	<LOD	6988	6046	1468	17	23	236	11540	17	17	36	44	21.3	23.6	150	3.6
Preah Vihear	Building E	Brown	0.031	1722	<LOD	503	1773	6234	893	<LOD	9	191	7385	5	7	16.6	35.1	15.4	12.2	80	3.1		Preah Vihear	Building O2	Brown	0.04	<LOD	1123	82	7417	6697	1754	30	29	235	11127	15	34	23.2	42.7	20.9	15.7	241	3.1
Preah Vihear	Building E	Brown	0.031	<LOD	361	307	3947	5949	1222	37	21	149	11362	24	23	39	31.8	14.3	16	84.5	7		Preah Vihear	Building O2	Brown	0.04	<LOD	937	<LOD	5719	6039	1516	10	23	204	12706	18	10	31	38.7	17.5	19	224	7.6
Preah Vihear	Building E	Brown	0.031	<LOD	313	121	2314	6084	1110	<LOD	14	152	8071	21	8	5.8	15.2	12.3	8.4	68.5	5.5		Preah Vihear	Building O2	Brown	0.04	1323	<LOD	932	6440	6407	1303	14	18	166	10959	21	10	33	46.7	19.1	14	97.1	<LOD
Preah Vihear	Building F	Brown	0.044	944	340	103	9444	6504	1711	203	44	194	12622	20	13	42	36.3	31	15.1	119.4	6.1		Preah Vihear	Building P	Brown	0.057	<LOD	1418	133	8427	6262	1227	51	49	187	16930	8	20	37	40	17.5	17.9	157	29
Preah Vihear	Building F	Brown	0.044	1114	374	77	3412	6183	1203	<LOD	18	148	10320	8	11	22.1	29.1	14.1	11.2	134.2	3.8		Preah Vihear	Building P	Brown	0.057	<LOD	1011	117	8341	6433	1260	24	24	177	13624	6	17	30	46.6	19.3	14.4	73.2	8.6
Preah Vihear	Building F	Brown	0.044	<LOD	523	180	3958	6615	1210	<LOD	17	188	8826	14	11	19.4	34.2	20.3	13.5	77.5	7.9		Preah Vihear	Building P	Brown	0.057	<LOD	1497	<LOD	4973	6137	1503	<LOD	21	152	11706	16	64	46	34.6	23.9	13.7	276	4.1
Preah Vihear	Building F	Brown	0.044	<LOD	463	248	2639	6124	841	<LOD	12	161	7568	15	10	17.6	18	14	9.6	52.5	1.9		Preah Vihear	Building P	Brown	0.057	<LOD	838	773	8423	7010	1564	248	70	349	18055	11	113	58	47.1	32.9	29.2	79.6	8.8
Preah Vihear	Building F	Brown	0.044	<LOD	613	161	274	6148	750	<LOD	14	153	6846	<LOD	8	11.6	19.7	11.9	9.7	62	2		Preah Vihear	Building P	Brown	0.057	<LOD	2338	133	10220	6280	1230	43	31	221	18558	<LOD	37	20.4	41.2	21.8	12.5	80.4	13.6
Preah Vihear	Building G	Brown	0.054	<LOD	731	202	7982	6318	1625	53	38	222	10767	21	27	50	46	25.7	32.1	130.5	12.1		Preah Vihear	Building Q	Brown	0.036	<LOD	4490	750	5916	17672	1196	38	28	201	11296	37	64	42	28.9	34.9	22.2	64.2	5.2
Preah Vihear	Building G	Brown	0.054	<LOD	1044	124	995	6286	1095	103	17	199	7999	12	38	24.6	16.5	13.3	19.3	75.8	135		Preah Vihear	Building Q	Brown	0.036	<LOD	779	<LOD	7564	6375	1387	95	41	257	11938	10	67	45	44.5	24.2	23.5	76.1	6
Preah Vihear	Building G	Brown	0.054	<LOD	847	<LOD	7018	6184	1338	37	32	213	12078	28	47	43	38.3	27.9	14.6	146	5.6		Preah Vihear	Building Q	Brown	0.036	<LOD	1107	109	4438	6241	1299	217	35	159	8760	5	17	24.3	23.3	15.4	11	84.6	4.2
Preah Vihear	Building G	Brown	0.054	1456	529	89	6694	6202	1549	117	32	184	11662	29	24	51	38.3	26.1	15.3	216	11.6		Preah Vihear	Building Q	Brown	0.036	<LOD	1463	652	5995	6741	1226	63	23	202	10423	17	11	19.6	27.3	16.6	17.8	112.5	3.1
Preah Vihear	Building G	Brown	0.054	<LOD	428	172	7771	6321	1778	195	27	188	12659	31	24	69	47.9	24.5	16	99.5	7.3		Preah Vihear	Building Q	Brown	0.036	<LOD	3635	644	9529	7970	1434	34	43	230	14275	33	119	41	33.6	19.2	20.6	95.1	2.3
Preah Vihear	Building H1	Brown	0.022	1005	3247	135	2916	6067	1342	115	32	162	9495	24	16	58	16.7	43.1	18.5	129.2	19.6		Preah Vihear	Building T	Brown	0.029	<LOD	539	<LOD	4589	6037	907	<LOD	39	178	10218	8	10	17.5	27.1	12.5	10	60.8	3.1
Preah Vihear	Building H2	Brown	0.022	<LOD	6442	169	5372	6176	1126	115	35	170	7019	23	23	47	20.9	87.1	13	99	69		Preah Vihear	Building T	Brown	0.029	<LOD	661	213	419	6170	663	<LOD	15	137	7694	11	7	7.2	9.5	9.7	8.9	43.8	<LOD
Preah Vihear	Building H3	Brown	0.022	<LOD	4589	143	4791	6283	807	16	25	169	6408	19	13	35	20.1	118.1	13.6	52.9	8.3		Preah Vihear	Building T	Brown	0.029	<LOD	873	167	2394	6095	1416	<LOD	12	286	9104	12	18	23	24.2	12.9	9.4	112.5	24.5
Preah Vihear	Building H4	Brown	0.022	1080	6054	315	6058	6552	933	38	33	303	7995	40	15	52	16.5	96.4	19.1	49.5	4.3		Preah Vihear	Building T	Brown	0.029	<LOD	1643	<LOD	7354	6166	1314	21	24	209	12192	14	11	34	49.6	22.5	16.3	112.5	6.2
Preah Vihear	Building H5	Brown	0.022	1892	4658	215	4736	6403	1046	11	28	174	8598	15	22	40	23.2	46.4	11.9	64.6	6.8		Preah Vihear	Building T	Brown	0.029	<LOD	853	152	6406	6323	1019	32	34	239	13302	9	10	31	32.5	15.4	16.6	71.1	6.8
Preah Vihear	Building H2	Brown	0.023	<LOD	11500	125	10047	6087	1073	117	35	189	9981	23	34	48	30.4	68.6	16.6	58.2	13.1		Preah Vihear	Building W	Brown	0.059	<LOD	684	<LOD	<LOD	6154	684	<LOD	<LOD	134	6881	8	16	6.9	11.6	11.1	6.9	53.1	5.3
Preah Vihear	Building H3	Brown	0.023	1098	6023	70	5888	6106	1256	79	33	174	11845	20	51	54	28.1	82.4	18.1	79	11.6		Preah Vihear	Building W	Brown	0.059	<LOD	1159	108	1443	6421	883	<LOD	10	163	8456	<LOD	16	17.1	22.2	13.8	12.1	107.5	<LOD
Preah Vihear	Building H4	Brown	0.023	2806	12139	77	8961	6581	1130	86	42	198	8125	10	38	45	24	42.4	11.6	83.1	4.4		Preah Vihear	Building W	Brown	0.059	<LOD	1223	<LOD	2153	6142	972	30	14	140	8807	15	15	12.6	22.7	19.4	12.9	73.2	5.2
Preah Vihear	Building H5	Brown	0.023	1970	22624	<LOD	12923	6303	1013	114	39	168	5896	22	31	91	22	90.9	11.3	53.9	31		Preah Vihear	Building W	Brown	0.059	<LOD	558	<LOD	12988	6406	859	<LOD	14	144	9679	4	15	15.5	53.7	20	11.6	62	4.9
Preah Vihear	Building H6	Brown	0.023	2416	15629	<LOD	9981	6004	975	120	37	159	6508	21	33	55	13.5	42.9	10.6	58.4	12.7		Preah Vihear	Building W	Brown	0.059	<LOD	598	<LOD	<LOD	6106	606	<LOD	9	129	7130	7	8	8.4	13.4	9	6.4	38.7	4.3
Preah Vihear	Building J	Brown	0.068	<LOD	531	153	8955	6551	1616	70	31	183	13049	13	59	41	41.3	23.5	13.3	125.9	7.9		Outcrop	point4	Brown	0.05	<LOD	601.5	<LOD	10938.7	6625.67	1937.33	16.6667	7	155.333	11959.7	2.46667	9	15	61.4667	17.5	19.4667	140.1	5.66667
Preah Vihear	Building J	Brown	0.068	<LOD	361	<LOD	5996	6166	1305	6	26	228	10934	10	25	49	46.4	23.1	10.8	104	6.9		Outcrop	point9	Brown	0.05	<LOD	413	192.5	15939.2	6496.8	1000.8	<LOD	<LOD	178.2	10916.8	1.4	9.8	9.6	53.72	15.96	9.56	68.36	4.8
Preah Vihear	Building J	Brown	0.068	<LOD	2276	145	6890	6068	1239	43	34	162	12299	14	74	36	33.6	39.2	11.2	100.9	17.3		Outcrop	point5	Brown	0.06	<LOD	529.333	<LOD	20267.3	6530.67	1681	27.6667	8.5	168	10151.3	7	18	12	61.9333	21.2667	10.1	109.1	6.33333
Preah Vihear	Building J	Brown	0.068	<LOD	701	112	9208	6234	1900	79	30	249	13526	65	160	147	47.4	29.4	19.2	180	43		Outcrop	point10	Brown	0.07	<LOD	1487	250.25	14556.8	46678	1480.2	87.5	56.5	300.2	9998.2	2.8	14.8	32	62.26	50.7	39.6	118.3	7.44
Preah Vihear	Building J	Brown	0.068	<LOD	812	3111	5925	6752	1237	21	22	197	12541	43	45	50	30.7	18	11.3	139	4.8
pale brown siliceous sandstone used in Preah Vihear temple (Phra Wihan Formation)
Places		Color	P (ppm)	S (ppm)	Cl (ppm)	K (ppm)	Ca (ppm)	Ti (ppm)	V (ppm)	Cr (ppm)	Mn (ppm)	Fe (ppm)	Co (ppm)	Cu (ppm)	Zn (ppm)	Rb (ppm)	Sr (ppm)	Y (ppm)	Zr (ppm)	Pb (ppm)
Outcrop	point4	Brown	<LOD	680	<LOD	9583	6487	1712	18	<LOD	150	10181	2.1	8	13	57.1	15.2	10.6	102.5	8
Outcrop	point4	Brown	<LOD	<LOD	<LOD	11759	6861	2172	14	7	160	11118	2.8	11	17	64.7	19.5	34.4	125.8	5
Outcrop	point4	Brown	<LOD	523	<LOD	11474	6529	1928	18	<LOD	156	14580	2.5	8	15	62.6	17.8	13.4	192	4
Outcrop	point9	Brown	<LOD	260	132	15911	6581	1033	<LOD	<LOD	159	9953	<LOD	7	12	54.7	16.2	8.3	65.1	5
Outcrop	point9	Brown	<LOD	<LOD	219	17247	6452	832	<LOD	<LOD	160	9425	<LOD	12	9	50.4	15	14.5	54.6	4
Outcrop	point9	Brown	<LOD	457	<LOD	16109	6463	1098	<LOD	<LOD	154	9652	<LOD	11	6	54.5	15.8	5.3	84.8	6
Outcrop	point9	Brown	<LOD	<LOD	214	17729	6510	1171	<LOD	<LOD	175	12655	1.4	16	12	65.7	17.4	9.6	80.1	4
Outcrop	point9	Brown	<LOD	522	205	12700	6478	870	<LOD	<LOD	243	12899	<LOD	3	9	43.3	15.4	10.1	57.2	5
Outcrop	point5	Brown	<LOD	666	<LOD	20440	6476	1768	16	10	168	9222	2	10	15	59.1	20.2	10.4	145	6
Outcrop	point5	Brown	<LOD	494	<LOD	21028	6582	1362	21	<LOD	163	8143	1.9	15	10	68.8	22.8	11.1	108.7	4
Outcrop	point5	Brown	<LOD	428	<LOD	19334	6534	1913	46	7	173	13089	17.1	29	11	57.9	20.8	8.8	73.6	9
Outcrop	point10	Brown	<LOD	1365	332	13573	7961	1504	24	<LOD	330	10342	2.7	7	34	61.5	46.6	17.7	92.7	4
Outcrop	point10	Brown	<LOD	1609	324	5036	204908	1154	<LOD	<LOD	438	8130	3.4	8	23	58.8	52.9	22	114.2	8
Outcrop	point10	Brown	<LOD	<LOD	138	15483	6822	1092	82	<LOD	261	10567	2.8	10	22	47.6	41.7	11.1	60.8	9
Outcrop	point10	Brown	<LOD	<LOD	<LOD	22274	6950	1320	100	38	214	10645	3.3	12	42	78.3	63.2	58.8	86.8	12
Outcrop	point10	Brown	<LOD	<LOD	207	16418	6749	2331	144	75	258	10307	1.8	37	39	65.1	49.1	88.4	237	4.2
			MS（×10-3 SI unit）	P	S	Cl	K	Ca	Ti	V	Cｒ	Mn	Fe	Co	Cu	Zn	Rb	Sr	Y	Zr	Pb
		point4	0.05	<LOD	601.5	<LOD	10938.7	6625.67	1937.33	16.6667	7	155.333	11959.7	2.46667	9	15	61.4667	17.5	19.4667	140.1	5.66667
		point5	0.06	<LOD	529.333	<LOD	20267.3	6530.67	1681	27.6667	8.5	168	10151.3	7	18	12	61.9333	21.2667	10.1	109.1	6.33333
		point9	0.05	<LOD	413	192.5	15939.2	6496.8	1000.8	<LOD	<LOD	178.2	10916.8	1.4	9.8	9.6	53.72	15.96	9.56	68.36	4.8
		point10	0.07	<LOD	1487	250.25	14556.8	46678	1480.2	87.5	56.5	300.2	9998.2	2.8	14.8	32	62.26	50.7	39.6	118.3	7.44

## Sheet: Sao Khua
Table S1: Magnetic susceptibilities and chemical compositions determined by pXRF for pale brown siliceous sandstone, red siliceous sandstone, and gray sandstone.
Red siliceous sandstone used in the Angkor momument (Sao Khua Formation)																							Red siliceous sandstone used in the Angkor momument (Sao Khua Formation)
Temples		Color	MS（×10-3 SI unit）	P (ppm)	S (ppm)	Cl (ppm)	K (ppm)	Ca (ppm)	Ti (ppm)	V (ppm)	Cr (ppm)	Mn (ppm)	Fe (ppm)	Co (ppm)	Cu (ppm)	Zn (ppm)	Rb (ppm)	Sr (ppm)	Y (ppm)	Zr (ppm)	Pb (ppm)		Temples		Color	MS（×10-3 SI unit）	P (ppm)	S (ppm)	Cl (ppm)	K (ppm)	Ca (ppm)	Ti (ppm)	V (ppm)	Cr (ppm)	Mn (ppm)	Fe (ppm)	Co (ppm)	Cu (ppm)	Zn (ppm)	Rb (ppm)	Sr (ppm)	Y (ppm)	Zr (ppm)	Pb (ppm)
Bayon	Crucifirm terrace	Red	0.016	2296	1347	283	<LOD	6958	1668	46	21	1591	10365	<LOD	4221	2001	14.5	20.3	8.5	93.8	106		Banteay Srei	East gopura in the inner gallery	Red	0.063	<LOD	691	<LOD	<LOD	6543	1480	34	17	999	9772	2.4	22	15.6	14.4	70.2	28.8	120.3	12.2
Bayon	Crucifirm terrace	Red	0.019	<LOD	1741	257	<LOD	7247	1684	62	32	631	9763	<LOD	3198	1548	11.5	64.8	9.7	92.6	55		Banteay Srei	East gopura in the inner gallery	Red	0.051	<LOD	197	<LOD	<LOD	7439	1743	67	21	1377	11386	2.3	31	40	11.4	78.5	17.4	144	34
Bayon	Crucifirm terrace	Red	0.017	<LOD	2398	449	609	8016	1911	80	47	2961	11317	<LOD	4638	2217	15.8	34.5	13.3	108.1	102		Banteay Srei	East gopura in the inner gallery	Red	0.015	<LOD	1380	182	<LOD	7047	1693	89	37	412	13153	<LOD	54	88	7.3	517	14.4	118	156
Bayon	Crucifirm terrace	Red	0.022	<LOD	2001	463	504	7503	1828	65	46	495	10560	<LOD	5791	2738	16.3	36.7	11.9	135.7	79		Banteay Srei	East gopura in the inner gallery	Red	0.048	<LOD	851	755	<LOD	10168	1757	24	26	845	11690	4.7	13	88	14	73.7	8.9	142	18.5
Bayon	Crucifirm terrace	Red	0.015	<LOD	1924	506	554	7518	1945	62	39	767	10366	1	4871	2379	16.3	46.6	7.9	162	75		Banteay Srei	East gopura in the inner gallery	Red	0.028	<LOD	929	482	<LOD	6646	2928	<LOD	28	384	7940	1.7	35	212	13.6	56	8.9	153	273
Bayon	Crucifirm terrace	Red	0.012	1388	3066	678	562	7788	1681	50	38	1115	9795	<LOD	7593	3634	12.4	60.8	8	86.6	40		Banteay Srei	East gopura in the inner gallery	Red	0.057	<LOD	358	163	<LOD	5945	1725	17	18	300	11420	6.1	23	23.9	13.1	89.4	16.3	174	13.9
Bayon	Crucifirm terrace	Red	0.01	<LOD	1555	293	<LOD	6646	1577	63	13	1696	8693	<LOD	2477	1211	16	47.1	15.6	126.8	74		Banteay Srei	East gopura in the inner gallery	Red	0.046	<LOD	761	312	<LOD	6447	2248	73	22	997	13534	4.2	14	28	16.6	71.5	12.7	197	31
Bayon	Crucifirm terrace	Red	0.024	<LOD	835	356	<LOD	6665	1551	67	31	553	8392	<LOD	3241	1586	13.4	48.8	8.2	138.3	90		Banteay Srei	East gopura in the inner gallery	Red	0.027	<LOD	785	437	<LOD	6797	2126	49	23	205	11202	<LOD	24	53	12.4	161	16.7	98.8	22.5
Bayon	Crucifirm terrace	Red	0.046	<LOD	1959	477	2472	7349	3289	128	76	439	24486	18.4	4475	2178	25.6	351	12.1	170	42		Banteay Srei	East gopura in the inner gallery	Red	0.054	1084	4901	159	2139	7739	1860	193	35	297	8824	2.5	89	145	14	365	10.1	109.5	19.9
Bayon	Crucifirm terrace	Red	0.065	<LOD	1102	255	1336	6899	3081	124	101	473	28022	18.5	2228	1089	20.8	333	16.9	202	81		Banteay Srei	East gopura in the inner gallery	Red	0.037	<LOD	1182	133	<LOD	6132	1188	27	18	234	7504	2.3	16	14.6	13.3	60.2	12.4	110.7	12.1
Terrace of Elephants	South part	Red	0.037	<LOD	2761	110	<LOD	9117	1390	32	17	201	10323	1.1	22	13.2	10.8	47.9	7.2	87.1	28		Banteay Srei	East gopura in the inner gallery	Red	0.07	<LOD	732	438	<LOD	6243	2316	10	17	1318	10839	5.4	22	108	14.8	75.6	11.9	169	18.2
Terrace of Elephants	South part	Red	0.043	8626	3553	114	<LOD	21372	1442	114	48	494	12191	1.2	7	36	5.6	63.2	16.8	133.8	135		Banteay Srei	East gopura in the inner gallery	Red	0.053	<LOD	1691	173	<LOD	6275	1333	42	14	599	11934	4.2	14	16.3	12.9	102.1	9.3	109.6	29
Terrace of Elephants	South part	Red	0.046	<LOD	955	146	1901	12434	2909	202	64	672	11803	<LOD	30	48	12	109.3	17	101.2	223		Banteay Srei	East gopura in the inner gallery	Red	0.035	<LOD	659	<LOD	<LOD	6191	1944	63	26	254	9380	2.3	17	11.1	12.7	80.7	10	115.7	18.7
Terrace of Elephants	South part	Red	0.062	3843	1578	255	753	18465	2040	209	66	487	11258	<LOD	25	36	13.6	100.7	12.5	93.7	230		Banteay Srei	East gopura in the inner gallery	Red	0.036	<LOD	902	<LOD	<LOD	6098	1096	<LOD	11	338	7322	<LOD	17	15.9	14.6	18.8	8.9	94.8	13.7
Terrace of Elephants	South part	Red	0.044	5100	954	95	2852	27479	2287	120	32	639	10334	<LOD	40	79	20.9	187	8	116	143		Banteay Srei	East gopura in the inner gallery	Red	0.09	<LOD	881	<LOD	<LOD	6106	1330	18	24	635	12305	5.4	16	11.4	15.1	75.4	11.1	96	24.9
Terrace of Elephants	South part	Red	0.05	5503	3620	140	1416	19732	2339	230	72	410	12693	2.9	24	58	15	174	11.5	205	81		North Khleang	Central sanctuary	Red	0.065	<LOD	964	<LOD	1154	11861	2132	131	15	3847	12580	<LOD	21	47	12.2	118.6	12.6	104.6	45
Terrace of Elephants	South part	Red	0.039	<LOD	1342	309	2873	15688	2066	151	79	461	13408	<LOD	15	44	15.5	69.9	8.7	130.8	1057		North Khleang	Central sanctuary	Red	0.042	<LOD	316	<LOD	<LOD	11318	1652	20	<LOD	977	10419	<LOD	20	54	10.3	99.4	21.5	72.9	34
Terrace of Elephants	Central part	Red	0.039	1427	4936	<LOD	2479	13366	2623	170	95	665	24304	19.5	17	95	19	317	27.8	164	495		North Khleang	Central sanctuary	Red	0.059	<LOD	541	<LOD	1153	15530	2305	42	16	1486	12696	1.4	24	27	11.8	130	10.9	166	67
Terrace of Elephants	East part	Red	0.039	<LOD	2427	333	1730	15319	2503	241	84	749	10965	<LOD	25	61	13.8	33.4	7.1	139	1195		North Khleang	Central sanctuary	Red	0.063	<LOD	2533	<LOD	<LOD	8349	1301	<LOD	<LOD	315	9122	3.8	10	8	9.5	62	11.7	114.7	29
Terrace of Elephants	East part	Red	0.094	<LOD	613	<LOD	2352	6086	3860	85	41	382	19879	19.5	22	19	30.6	274	18.1	277	299		North Khleang	Central sanctuary	Red	0.075	<LOD	1679	<LOD	<LOD	7680	1272	<LOD	<LOD	297	9484	3.9	15	13	10.6	103.2	46.2	155	17
Terrace of the Leper King	East part	Red	0.043	<LOD	998	171	<LOD	6886	1596	24	25	303	7390	<LOD	20	21.7	11.7	95.1	10	100	138		North Khleang	Central sanctuary	Red	0.049	<LOD	872	<LOD	984	9399	1811	101	30	3426	10239	<LOD	22	26.5	8.2	115.2	12.7	85.5	29
Terrace of the Leper King	East part	Red	0.045	<LOD	2915	<LOD	<LOD	8497	2350	70	23	228	8982	<LOD	17	13.1	10.8	71.5	7.4	151	164		North Khleang	Central sanctuary	Red	0.074	<LOD	819	79	1632	14547	2028	198	38	7377	10801	<LOD	17	76	9.3	125	19.3	84	32
Terrace of the Leper King	South part	Red	0.035	<LOD	7455	226	<LOD	10580	1569	118	21	240	9479	2.3	19	32	9.6	34.3	10.4	81.9	121		North Khleang	Central sanctuary	Red	0.04	3751	1042	235	2137	14510	2366	76	39	1517	12693	3.4	24	38	12.2	138	14.9	202	65
Terrace of the Leper King	South part	Red	0.039	<LOD	10148	159	1944	10111	2120	136	48	367	17662	<LOD	24	50	13.3	41.2	8.4	114.7	166		North Khleang	Central sanctuary	Red	0.041	<LOD	3450	1214	1876	9307	1775	56	14	290	11083	4.6	21	9.1	11.7	79.1	13.1	127.7	32
Terrace of the Leper King	South part	Red	0.034	<LOD	1507	<LOD	<LOD	6564	1359	<LOD	17	192	10465	2.2	20	26.7	13.6	27.4	7.3	120.3	40		North Khleang	Central sanctuary	Red	0.063	<LOD	1752	<LOD	<LOD	8000	1843	10	26	333	11570	6.1	24	15.3	9.7	101.3	76.5	226	26
Terrace of the Leper King	North part	Red	0.027	<LOD	1793	123	<LOD	8151	1246	37	34	353	10875	5.5	29	42	11.4	98.9	12.3	95.9	777		South Khleang	East causeway	Red	0.05	<LOD	862	<LOD	<LOD	6674	1246	<LOD	<LOD	181	9613	4.5	17	6.6	9.7	69.1	8.8	101.3	29
Terrace of the Leper King	North part	Red	0.021	<LOD	5596	194	2274	9042	1796	67	36	497	10539	<LOD	40	33	11.3	86	13.1	91.5	99		South Khleang	East causeway	Red	0.05	<LOD	1259	<LOD	<LOD	<LOD	1356	<LOD	<LOD	727	11557	4.1	20	13	10.5	63.8	10	109.2	64
Terrace of the Leper King	North part	Red	0.026	<LOD	2745	221	<LOD	7052	1938	19	35	426	9497	<LOD	44	27	9.4	81.3	11.7	128.9	587		South Khleang	East causeway	Red	0.041	<LOD	957	<LOD	<LOD	7232	1439	21	<LOD	198	9897	1.7	16	6.1	9.5	61.3	9.1	77.4	24
Terrace of the Leper King	North part	Red	0.05	<LOD	1782	131	817	8536	2361	210	42	1601	10716	<LOD	35	68	11.6	69.9	13.3	103.9	309		South Khleang	East causeway	Red	0.057	<LOD	2170	<LOD	1474	7105	1356	<LOD	<LOD	226	10815	4.2	16	8	10.8	72.8	10.9	241	36
Terrace of the Leper King	North part	Red	0.024	<LOD	861	386	720	7959	2123	128	17	2067	9385	<LOD	43	46	10.6	70.5	8	90.7	254		South Khleang	East causeway	Red	0.046	<LOD	3649	247	2068	8276	1135	<LOD	<LOD	264	10669	3.3	16	7	8.6	63.2	6.7	117.9	35
Preah Pithu	Temple T	Red	0.079	1976	899	<LOD	<LOD	6810	3654	186	62	211	26257	18.9	18	45	19.5	289	19.5	331	58		South Khleang	East causeway	Red	0.036	<LOD	459	101	<LOD	9478	1507	7	22	290	10878	5.4	16	11	11	67.4	9.7	102.2	36
Preah Pithu	Temple T	Red	0.056	<LOD	634	<LOD	<LOD	6847	3260	367	35	256	27813	18.9	17	59	18.2	290	19.1	188	60		South Khleang	East causeway	Red	0.054	<LOD	746	121	<LOD	6156	1291	<LOD	14	572	7748	2.2	17	9.7	11.3	68	12.1	104.5	16.9
Preah Pithu	Temple T	Red	0.057	<LOD	1525	<LOD	1607	8676	3031	101	36	342	24263	11	14	21	21	264	13.9	208	56		South Khleang	East causeway	Red	0.051	<LOD	1527	143	182	6308	1411	54	21	340	9604	3	17	7.9	10.2	73.2	11.1	83.5	15.3
Preah Pithu	Temple T	Red	0.068	<LOD	2915	<LOD	2866	8613	4477	212	106	405	46471	25	20	19	18.2	654	19.7	151	120		South Khleang	East causeway	Red	0.074	<LOD	690	188	<LOD	7723	1557	50	31	1052	9127	3.1	19	39	11.9	92.4	12.9	139	84
Preah Pithu	Temple T	Red	0.048	<LOD	1688	185	855	6998	2462	160	45	391	14379	10.3	20	19.6	13.8	44.1	9.2	241	62		South Khleang	East causeway	Red	0.074	<LOD	1036	187	<LOD	6499	1485	88	20	2132	12211	1.5	21	21.3	11.7	50.7	7	101.2	134
Preah Pithu	Temple T	Red	0.032	<LOD	1480	254	146	6709	2070	189	28	464	10227	4.3	18	20.5	12.8	452	9.9	127	108		Preah Palilay	Cruciform terrace	Red	0.023	<LOD	1422	76	<LOD	6392	1656	44	24	238	9362	3.5	24	15.8	13.6	18.7	9.7	186	91
Preah Pithu	Temple T	Red	0.027	<LOD	1011	<LOD	<LOD	6393	1677	107	16	243	10136	4.9	17	14.3	15.3	51.7	11.8	114.6	36		Preah Palilay	Cruciform terrace	Red	0.023	<LOD	1499	839	<LOD	6739	1780	44	29	263	8483	<LOD	57	19.8	14	39.7	8	95.7	72
Preah Pithu	Temple T	Red	0.036	1481	1636	782	1416	15026	1974	32	34	350	10664	2.8	21	25.9	13.7	88.7	8.7	95.1	48		Preah Palilay	Cruciform terrace	Red	0.033	<LOD	1342	76	<LOD	6829	1797	110	25	891	11522	3.7	52	19.6	9.5	33.8	7.6	109.8	63
Preah Pithu	Temple T	Red	0.03	<LOD	1193	192	645	8575	1832	52	25	232	12389	2.4	33	35	17.5	79.8	15.3	181	40		Preah Palilay	Cruciform terrace	Red	0.031	<LOD	1966	79	<LOD	6586	1808	118	20	281	10971	3.6	34	16.2	16.8	54.5	9.6	147	63
Preah Pithu	Temple T	Red	0.051	<LOD	183	175	<LOD	6144	1624	66	16	157	6800	<LOD	22	10.1	11.2	18.8	8.1	124.6	24.6		Preah Palilay	Cruciform terrace	Red	0.01	<LOD	782	223	<LOD	6954	1646	10	24	286	6222	<LOD	17	12.9	15.8	32.9	9.4	125.9	87
Preah Pithu	Temple T	Red	0.027	<LOD	195	<LOD	<LOD	6237	1181	59	19	145	8469	<LOD	8	7.8	5.3	22	8.9	52.9	13.5		Preah Palilay	Central tower	Red	0.022	<LOD	820	<LOD	<LOD	6321	1187	30	19	169	10718	<LOD	13	10.1	7.3	23.8	10.5	51.8	8.9
Preah Pithu	Temple T	Red	0.071	<LOD	322	<LOD	205	6263	4438	230	100	228	31852	21.5	19	45	16.3	311	22.7	402	53		Preah Palilay	Central tower	Red	0.003	<LOD	2391	667	<LOD	9266	1096	<LOD	15	189	6844	<LOD	14	16.5	7.2	24.7	8.9	72	10.8
Preah Pithu	Temple T	Red	0.074	18551	1942	540	4441	33519	3467	211	89	556	24043	21.8	20	62	21.4	320	18.6	211	47		Preah Palilay	Central tower	Red	0.01	925	502	197	<LOD	6251	847	5	16	149	6185	<LOD	11	3.6	5.7	32.5	10.3	91.9	8
Preah Pithu	Temple U	Red	0.059	<LOD	1928	<LOD	2357	7611	3262	132	74	214	23914	16	13	31	20.8	306	12.4	243	39		Preah Palilay	Central tower	Red	0.052	<LOD	4439	259	187	12221	1795	105	28	242	11113	4.1	22	18.7	8.7	37.7	6.6	134.4	40
Preah Pithu	Temple U	Red	0.037	1069	2447	156	1206	7576	1197	13	15	217	8745	2.8	21	9.5	9.2	91.6	15	84.4	15		Preah Palilay	Central tower	Red	0.022	<LOD	2082	892	264	9586	1460	<LOD	16	199	9377	<LOD	12	4.8	8.4	24.7	12	113.7	6.9
Preah Pithu	Temple U	Red	0.014	<LOD	<LOD	162	<LOD	6161	775	<LOD	14	139	8097	<LOD	11	4.1	5.2	17.8	7	44.7	11.5		Preah Khan	Dancing hall	Red	0.032	<LOD	2258	<LOD	<LOD	6976	1132	10	13	216	9138	2.7	11	25.9	11.2	23.6	8.2	99.2	34
Preah Pithu	Temple U	Red	0.025	<LOD	418	143	938	6918	1334	52	17	146	12071	3.2	25	21.3	14.3	37.7	8.9	87	144		Preah Khan	Dancing hall	Red	0.04	<LOD	1711	324	512	10097	1237	23	12	169	10993	5	16	17.1	13	46.6	8.5	99.5	89
Preah Pithu	Temple X	Red	0.022	<LOD	1851	230	728	7070	2225	85	42	215	11735	4.5	21	17.4	16.2	48.2	8.6	134.1	39		Preah Khan	Dancing hall	Red	0.018	<LOD	1443	106	<LOD	6746	1757	116	37	252	11307	5.1	14	21.7	12.5	230	9.3	90.3	371
Preah Pithu	Temple X	Red	0.047	<LOD	1840	168	<LOD	6624	1622	69	24	220	10505	3	14	10.6	11.1	58.5	7.4	87.7	24.1		Preah Khan	Dancing hall	Red	0.019	<LOD	534	<LOD	<LOD	6240	1500	62	19	202	7876	1.8	23	12.6	16.3	31.8	8.5	113.4	74
Preah Pithu	Temple X	Red	0.041	<LOD	1263	91	<LOD	6806	2310	129	18	224	10367	4.1	20	13.7	15.7	28.4	10.1	186	27		Preah Khan	Dancing hall	Red	0.056	<LOD	2000	144	1206	10877	1342	9	24	161	12253	4.3	19	11.3	11.9	50.3	11.5	196	219
Preah Pithu	Temple X	Red	0.022	<LOD	1318	383	<LOD	6669	2005	204	50	203	10518	2.8	24	17.4	13.1	259	10	138	434		West Top	Central tower	Red	0.03	1113	852	119	<LOD	6627	1449	<LOD	13	159	9095	<LOD	14	10.8	10.4	25.8	9.1	149	20.3
Preah Pithu	Temple V	Red	0.044	<LOD	996	149	<LOD	6714	1422	31	18	166	9141	3.9	14	11.5	11.5	45.8	6.8	117.7	13.7		West Top	Central tower	Red	0.023	<LOD	894	145	<LOD	6601	1400	23	11	263	9323	15	6	19.3	7.7	39.3	10.2	69.7	15.7
Preah Pithu	Temple V	Red	0.035	<LOD	4011	502	5855	15845	1090	29	21	570	9369	4	17	38	13.6	33.7	8.4	76.3	27		West Top	Central tower	Red	0.041	<LOD	2009	149	<LOD	12606	981	<LOD	15	324	8264	<LOD	23	67	10.9	75	14.4	73.7	26.1
Preah Pithu	Temple V	Red	0.013	<LOD	1490	257	144	7314	1361	59	18	386	8126	1	24	29.4	8.6	51.2	8.6	73.1	43		West Top	Central tower	Red	0.031	<LOD	1250	79	482	7065	1501	23	13	169	7936	<LOD	40	612	12.4	55.9	11.9	148	29.6
Preah Pithu	Temple V	Red	0.032	<LOD	3075	252	677	37680	1366	27	21	253	9238	<LOD	41	10.2	9.1	79.3	11.8	131.4	50		West Top	Central tower	Red	0.004	<LOD	465	88	<LOD	6377	1256	<LOD	19	182	7615	7	17	599	9.6	30	10.6	101.3	15.6
Preah Pithu	Temple V	Red	0.045	<LOD	1928	<LOD	129	7681	1774	130	25	206	10270	4.6	17	18.5	14.2	37.4	8.8	137	59		West Top	Central tower	Red	0.033	2246	2169	253	3082	11935	1961	54	54	260	9917	19	30	5229	21.9	62.9	8.9	114	32
Preah Pithu	Temple V	Red	0.065	<LOD	2306	226	4189	8944	3338	129	54	289	23048	23	21	28	22.4	397	19.9	202	61		West Top	Central tower	Red	0.022	<LOD	1126	220	<LOD	7796	1240	52	15	209	8147	<LOD	21	322	13.6	75.9	10.4	109.1	314
Preah Pithu	Temple V	Red	0.055	9786	3954	258	5814	14735	3521	231	112	2253	29915	16.2	15	57	22.4	267	13.1	223	27		West Top	Central tower	Red	0.065	1912	1689	131	<LOD	9810	1602	56	23	647	11070	12	26	62	12.5	83.6	178	164	41
Preah Pithu	Temple V	Red	0.046	<LOD	1637	<LOD	1727	10360	3346	143	77	325	28419	21.9	20	35	21.6	307	18.3	302	39		West Top	Central tower	Red	0.053	2079	690	97	<LOD	10935	1208	<LOD	22	241	11076	<LOD	12	259	9.2	90.8	9.7	180	21
Banteay Srei	Central part	Red	0.113	<LOD	333	<LOD	<LOD	6872	1568	54	<LOD	2053	9927	2.9	13	17	10	69.5	10.8	157	34		West Top	Central tower	Red	0.065	<LOD	1186	<LOD	717	7173	2109	32	33	631	12071	<LOD	43	82	14.6	110.3	79.1	173	39
Banteay Srei	Central part	Red	0.093	<LOD	<LOD	<LOD	<LOD	8662	1299	77	543	400	11178	1.5	17	11	12.5	100.7	33.4	84.4	29		West Top	Central tower	Red	0.084	<LOD	985	166	<LOD	8957	1518	<LOD	6	148	9381	14	14	13.8	10.3	28.2	7.9	97.4	17.8
Banteay Srei	Central part	Red	0.058	<LOD	338	130	<LOD	6831	1204	15	<LOD	1005	10165	4.5	20	13	13.9	60.6	7.2	93.2	30
Banteay Srei	Central part	Red	0.165	<LOD	1658	<LOD	2301	27947	3263	76	61	250	30416	23.5	41	78	25.8	246	18	378	57
Banteay Srei	Central part	Red	0.037	<LOD	<LOD	<LOD	<LOD	7374	2672	107	43	1002	20088	9.4	15	19	17.3	256	17.1	224	30
Banteay Srei	Central part	Red	0.077	<LOD	2284	314	1384	15158	4035	183	68	250	22331	13.7	42	128	19.9	315	21.3	306	274
Banteay Srei	Central part	Red	0.077	<LOD	732	<LOD	<LOD	<LOD	1426	35	<LOD	555	7468	3.1	69	36	10.9	174	30.8	119.4	58
Banteay Srei	Central part	Red	0.029	<LOD	3396	<LOD	<LOD	6978	1162	16	<LOD	1505	7683	2.6	54	82	13.3	40.5	9	79.8	76
Banteay Srei	Central part	Red	0.024	1332	180	<LOD	<LOD	6678	1255	<LOD	<LOD	219	9810	5.3	43	26	12.6	94.9	12	123.5	20
Banteay Srei	Central part	Red	0.025	<LOD	823	<LOD	<LOD	6966	1220	<LOD	<LOD	287	9107	1.6	24	56	11.8	70.2	23.3	94.9	28
Banteay Srei	Central part	Red	0.034	<LOD	555	<LOD	<LOD	7947	1631	155	13	197	7678	1.4	37	10	13.7	81.3	10.1	117.7	29
Banteay Srei	Central part	Red	0.061	<LOD	<LOD	<LOD	<LOD	7943	1443	99	<LOD	3098	9533	2.2	30	63	12.1	67.1	19.9	129	48
Banteay Srei	Central part	Red	0.04	<LOD	312	<LOD	1300	11852	1497	58	12	774	10035	<LOD	23	150	27.8	71.3	11	87.7	33
Banteay Srei	Central part	Red	0.108	<LOD	314	<LOD	<LOD	<LOD	1544	<LOD	<LOD	212	11225	5.2	15	8	15.6	89.6	12.9	130.1	22
Banteay Srei	Central part	Red	0.034	<LOD	653	<LOD	<LOD	6885	2426	301	18	392	10319	1.5	42	13	14.3	91.5	10.4	150	68
Banteay Srei	Central part	Red	0.118	<LOD	<LOD	<LOD	<LOD	7132	2316	174	10	245	9942	1.3	21	26	16.3	59.3	8.6	162	33
Banteay Srei	Central part	Red	0.034	<LOD	487	<LOD	<LOD	7987	2021	237	13	329	8937	1.6	36	20	11.4	64.4	10.6	109.5	41
Banteay Srei	Central part	Red	0.037	<LOD	<LOD	<LOD	<LOD	<LOD	1139	<LOD	<LOD	193	18679	8.6	15	15	18.7	60	14.2	89.1	13
Banteay Srei	Central part	Red	0.053	<LOD	653	<LOD	<LOD	20961	2379	78	14	1430	15028	<LOD	23	41	12	111.5	54.8	113.7	63
Banteay Srei	Central part	Red	0.063	<LOD	488	<LOD	<LOD	7952	1769	170	<LOD	250	9601	4.7	21	14	12.7	64.6	8.2	119.7	16

## Sheet: Phu Kradung
Table S1: Magnetic susceptibilities and chemical compositions determined by pXRF for pale brown siliceous sandstone, red siliceous sandstone, and gray sandstone.
Gray to yellowish brown sandstone used in the Angkor momument (Phu Kradung Formation)																						Gray to yellowish brown sandstone used in the Angkor momument (Phu Kradung Formation)
Temples		MS（×10-3 SI unit）	P (ppm)	S (ppm)	Cl (ppm)	K (ppm)	Ca (ppm)	Ti (ppm)	V (ppm)	Cr (ppm)	Mn (ppm)	Fe (ppm)	Co (ppm)	Cu (ppm)	Zn (ppm)	Rb (ppm)	Sr (ppm)	Y (ppm)	Zr (ppm)	Pb (ppm)		Temples		MS（×10-3 SI unit）	P (ppm)	S (ppm)	Cl (ppm)	K (ppm)	Ca (ppm)	Ti (ppm)	V (ppm)	Cr (ppm)	Mn (ppm)	Fe (ppm)	Co (ppm)	Cu (ppm)	Zn (ppm)	Rb (ppm)	Sr (ppm)	Y (ppm)	Zr (ppm)	Pb (ppm)
Angkor Wat	Statue in the cruciform gallery	4.498	48957	2959	1326	18794	64010	2883	229	69	1662	19119	9.1	88	1303	65.3	274	16.7	214	1316		Preah Pithu	Building V	2.33	2391	726	265	17216	10632	3112	160	66	492	26900	18.3	14	64	67.4	175	20.1	277	9
Angkor Wat	Statue in the cruciform gallery	2.15	51869	3246	1615	36071	18633	2685	114	51	681	21347	13.9	50	262	72.5	222	18.4	186	70		Preah Pithu	Building V	3.24	1617	2097	748	16238	13574	3564	176	88	463	25590	15.3	10	52	60.8	200	20.7	338	14
Angkor Wat	Statue in the cruciform gallery	1.006	<LOD	475	1412	22396	20363	2797	93	25	298	17475	9.5	37	55	67.8	212	19.4	138	24		Preah Pithu	Building V	1.5	<LOD	1330	<LOD	17915	9749	3292	188	69	401	25193	15.7	18	52	68.4	162	21.7	238	15
Angkor Wat	Statue in the cruciform gallery	2.128	<LOD	3727	1248	23608	18438	3785	129	79	650	29270	17	23	77	78.7	185	22.6	274	13		Preah Pithu	Building V	1.51	<LOD	1183	219	21864	11799	3664	248	81	693	32650	18	15	69	72.4	214	22.6	155	9
Angkor Wat	Statue in the cruciform gallery	2.492	51114	9073	1691	31764	21179	3294	236	65	764	25033	22	33	478	89	238	11	258	4147		Preah Pithu	Building V	1.59	<LOD	1387	189	14069	11650	2757	185	57	400	21667	15.8	15	47	54.1	202	18	213	8.6
Angkor Wat	Statue in the cruciform gallery	1.672	51837	3618	1289	26512	28025	2256	105	41	748	18571	11.7	40	285	64.3	227	18	155	43		Preah Pithu	Building T	1.34	<LOD	2642	465	22488	71970	4021	776	93	558	24557	14.3	22	51	68.6	199	20	195	10
Angkor Wat	Statue in the cruciform gallery	2.19	19720	1739	425	19409	39652	2729	100	43	518	20072	16.6	41	397	64.7	215	20.1	182	14		Preah Pithu	Building T	4.51	2582	1411	302	16743	12251	3772	255	135	670	29188	15.8	14	56	59.4	214	111	319	9
Angkor Wat	Statue in the cruciform gallery	2.028	117491	7695	220	33748	34205	2528	142	65	499	17710	10.6	115	441	60.5	229	17.6	210	17		Preah Pithu	Building T	4.28	1974	1792	222	19234	12853	2928	107	59	492	25041	14.1	18	56	62.7	219	17.3	228	31
Angkor Wat	Statue in the cruciform gallery	2.356	73285	2535	1232	36060	9677	2738	78	55	625	19873	7.9	37	425	77.2	204	17.2	146	44		Preah Pithu	Building T	2.12	2754	2650	201	19436	14792	2750	142	67	457	23476	16.7	18	84	71.8	210	19.3	203	14
Angkor Wat	Statue in the cruciform gallery	2.082	15826	14173	957	17359	29944	3250	195	78	660	24326	12	14	82	61.4	187	22.9	288	15		Preah Pithu	Building T	4.48	<LOD	5191	114	18837	12515	3448	216	55	519	26550	20.7	9	60	71.5	218	23.4	292	14
Angkor Wat	Statue in the middle gallery	4.276	92579	1064	619	30219	25699	2414	68	50	855	17195	10.9	49	359	77.7	200	22.7	267	22		Preah Khan	Dancing hall	3.26	<LOD	978	144	14533	14419	7168	231	119	663	38198	20	25	59	52	289	32.5	639	242
Angkor Wat	Statue in the middle gallery	2.36	<LOD	12786	817	23289	20142	3162	147	61	475	22900	13.2	14	51	66.9	212	17.1	230	8		Preah Khan	Dancing hall	1	<LOD	489	<LOD	17681	9083	2079	88	46	372	20329	12.3	14	41	67.8	202	14.3	122	12.7
Angkor Wat	Statue in the middle gallery	4.652	<LOD	6694	1096	21112	28657	3542	157	60	758	33867	12	25	76	66.1	184	18.7	266	14		Preah Khan	Dancing hall	1.14	<LOD	835	98	12227	10021	2317	63	40	323	16247	11.9	11	36	50.1	212	16.7	203	44
Angkor Wat	Statue in the middle gallery	2.016	2016	6541	1043	18073	18295	2780	124	85	421	25854	9	12	41	62.6	185	16	167	10		Preah Khan	Dancing hall	1.16	<LOD	329	502	17625	10755	2433	81	50	382	19750	9.5	8	52	63.8	227	16.3	180	40
Angkor Wat	Statue in the middle gallery	2.164	7441	2716	1288	17629	48942	2690	110	51	476	20450	16.6	43	161	103	214	16.8	219	41		Preah Khan	Dancing hall	1.86	1124	1254	635	23156	11605	2157	94	43	473	19441	8.1	7	48	85.9	206	15.4	146	122
Angkor Wat	Statue in the middle gallery	2.262	1890	1144	1669	20918	11242	3586	173	92	457	26974	17	61	129	74.3	209	59.2	346	19		Preah Khan	Dancing hall	0.44	<LOD	502	460	14090	10241	2122	54	42	284	17643	7.7	11	33	58.4	195	15.9	160	26
Angkor Wat	Statue in the middle gallery	1.738	<LOD	5922	1089	16448	19431	3224	166	58	452	25414	10	17	42	60.5	198	18.5	184	224		Benteay Kdei	Dancing hall	3.23	2576	823	248	19164	12168	2573	120	60	460	23122	11.1	10	56	71.6	213	20.3	219	29
Angkor Wat	Statue in the middle gallery	1.35	8674	6036	850	17911	51603	2956	131	75	453	25599	21	50	109	72.3	240	19	323	3094		Benteay Kdei	Dancing hall	4.13	1144	456	<LOD	17719	9574	3224	109	80	522	26522	12.3	14	50	60.2	189	23.5	325	17
Angkor Wat	Statue in the middle gallery	1.41	11546	2209	834	16517	44442	2947	112	66	642	25436	17	35	84	59.3	216	21.2	235	918		Benteay Kdei	Dancing hall	2.66	<LOD	316	<LOD	21726	10308	3447	131	76	621	29512	13	11	70	79.1	204	26.5	302	23
Angkor Wat	Statue in the middle gallery	1.996	3420	1796	887	19183	27321	3502	172	55	679	30418	16	13	66	66.4	185	23.4	314	10		Benteay Kdei	Dancing hall	3.42	3733	246	<LOD	18101	14078	2779	106	58	515	22221	11.9	18	70	63.8	208	22.5	225	23
Angkor Wat	Statue in the middle gallery	3.28	7790	1438	1457	13180	25479	2473	116	70	516	21047	12.2	35	64	52	216	15.5	144	13		Benteay Kdei	Dancing hall	2.54	<LOD	552	162	20584	10309	2726	119	46	619	25217	14.3	16	73	68.5	199	19.5	207	82
Angkor Wat	Statue in the middle gallery	1.844	10774	<LOD	748	19609	10217	1839	91	43	386	17743	6.8	32	76	70.5	222	11.2	77.8	21		Pre Rup	Gopura in the inner gallery	1.51	<LOD	657	356	15086	9574	3144	114	57	387	20227	10.8	10	40	60.9	204	17.7	146	7.1
Angkor Wat	Statue in the middle gallery	1.088	100363	13472	712	39090	21304	2171	81	63	604	16960	10.1	35	170	86	227	14.9	138	34		Pre Rup	Gopura in the inner gallery	2.11	<LOD	<LOD	<LOD	18944	8647	2930	99	39	374	21457	6.1	15	37	72.4	210	16.5	227	15
Angkor Wat	Statue in the middle gallery	1.164	60153	7514	1709	36488	22351	2269	108	58	901	17501	7.5	50	267	72.6	231	14.5	156	35		Pre Rup	Gopura in the inner gallery	2.14	<LOD	333	95	18037	9625	2733	94	54	443	20942	12.8	12	38	61.9	203	18	225	11.6
Angkor Wat	Statue in the middle gallery	3.076	76277	26865	882	31909	23516	2315	112	54	596	19293	11.6	33	215	68	215	20.9	218	22		Pre Rup	Gopura in the inner gallery	4.25	<LOD	539	267	19059	10035	3261	118	60	408	25272	14.7	13	50	82.8	187	19.9	304	12
Angkor Wat	Statue in the middle gallery	0.956	97278	70714	1065	33534	35108	1703	51	38	780	19481	14.9	47	184	74.1	225	14.1	125	173		Pre Rup	Sanctuary	2.27	<LOD	1773	223	14776	10454	3115	198	80	719	22535	9.5	16	47	53	246	22.4	203	10
Angkor Wat	Statue in the middle gallery	1.294	6985	1964	1266	17017	21473	3616	172	104	534	25957	6	34	74	61.9	224	20.3	196	45		Pre Rup	Sanctuary	2.17	<LOD	797	372	16272	10468	2823	235	86	405	20529	11.6	21	44	60.6	228	23.3	188	9.9
Angkor Wat	Statue in the middle gallery	4.968	12208	4851	1527	30163	41506	4701	183	102	702	33121	18	23	57	66.5	215	29.2	673	12		Pre Rup	Sanctuary	2.69	<LOD	672	96	15092	9556	2900	170	56	407	20319	11.1	15	51	63.8	282	16.3	217	10
Angkor Wat	Statue in the middle gallery	2.708	2862	2300	1155	22272	17689	3139	163	58	602	27228	8	11	60	63.1	200	18.3	170	6		Pre Rup	Sanctuary	2.29	<LOD	752	102	15601	9716	2986	209	70	465	23260	8	12	51	62.7	299	19.1	192	8
Angkor Wat	Statue in the middle gallery	1.226	28083	2014	4616	25632	55820	3540	96	51	498	17695	14.3	36	67	94.5	210	19.4	244	22		Pre Rup	Sanctuary	2.24	<LOD	1183	<LOD	14841	10145	2951	97	54	424	21057	9.5	13	56	61.7	205	18.3	227	11
Bayon	Outer gallery	2.44	1395	437	<LOD	19119	15814	2844	163	47	344	19047	12.2	23	86	66	233	20.2	197	30		Pre Rup	Sanctuary	3.24	<LOD	1959	<LOD	17464	10610	3181	203	74	559	21354	10	11	42	66.3	208	17.3	200	13
Bayon	Outer gallery	2.05	4605	580	168	17042	19508	4944	179	67	483	29213	18.9	16	104	61.9	246	30.2	534	30		Phnom Bakheng	Central sanctuary	12.4	1765	1428	755	13630	18021	4604	159	75	533	30893	19.6	15	60	53.7	221	31.1	457	35
Bayon	Outer gallery	1.34	<LOD	1217	165	15729	10815	2523	77	45	300	17549	11.7	16	78	63.5	211	20.1	173	34		Phnom Bakheng	Central sanctuary	10.1	<LOD	1700	430	15198	24224	5003	180	117	1109	38516	20	14	111	53.6	198	23.4	413	11
Bayon	Outer gallery	2.18	<LOD	248	107	16140	10660	2503	94	69	399	21916	10.8	11	129	53.6	229	19.3	201	27		Phnom Bakheng	Central sanctuary	4.52	<LOD	1468	218	15672	16110	2875	81	74	492	20667	15.9	14	78	55.3	202	23.6	320	10
Bayon	Outer gallery	0.6	<LOD	<LOD	<LOD	13882	9803	2226	96	41	320	18352	9.6	13	66	54.2	214	15.5	119	78		Phnom Bakheng	Central sanctuary	10.9	<LOD	2442	733	14923	20795	4107	120	78	651	30237	18.7	62	279	56	212	25.3	427	26
Bayon	Inner gallery	0.33	<LOD	627	273	15538	11945	2427	176	50	322	16990	9.6	25	238	57.5	217	15.5	115	28		Phnom Bakheng	Central sanctuary	10.2	1512	538	140	14470	15498	4856	157	133	693	33286	18.4	14	156	54.7	205	26.7	343	25
Bayon	Inner gallery	0.76	<LOD	330	<LOD	24602	8679	2221	129	35	324	17862	12.2	12	53	74.5	206	11.6	102.8	31		Phnom Bakheng	Central sanctuary	6.01	<LOD	784	266	17938	9897	3715	105	86	719	32035	18.8	20	85	65	188	20.2	372	29
Bayon	Inner gallery	2.45	<LOD	<LOD	426	20453	11198	2435	99	50	367	21582	13.7	18	52	69.6	205	19	188	19		Phnom Bakheng	Sanctuary	10.9	1528	<LOD	304	15444	12829	4235	157	84	731	33627	24	17	85	56.3	200	23.9	347	10
Bayon	Inner gallery	1.04	<LOD	887	131	18397	13563	2706	95	53	346	18549	12.9	12	73	66.2	203	17.4	178	30		Phnom Bakheng	Sanctuary	13	<LOD	779	340	15515	15250	5118	151	132	637	31938	21.9	19	75	52.8	206	27.5	383	7
Bayon	Inner gallery	1.42	<LOD	582	152	20403	10251	2734	127	58	335	18946	14.5	13	84	67.2	229	19.2	182	21		Phnom Bakheng	Sanctuary	12.8	<LOD	1666	501	13590	13153	4578	131	99	767	34500	19	23	134	52.9	198	23.5	488	10
Baphuon	Outer gallery	0.73	<LOD	656	<LOD	21412	9987	2192	180	45	564	25015	15.5	28	59	64.6	213	17.9	117	14		Phnom Bakheng	Sanctuary	6.08	<LOD	596	202	14827	10642	3119	109	67	486	24310	14.3	13	92	51.9	201	23.4	334	12
Baphuon	Outer gallery	1.95	1127	<LOD	222	18763	13129	2403	112	59	379	21566	12.7	21	72	74.7	195	20.7	175	17		Bakong	Long building along the causeway	3.24	<LOD	580	204	18244	11646	3508	234	82	780	26173	15.8	18	71	71.4	214	21.6	239	10
Baphuon	Outer gallery	1.27	<LOD	593	164	14614	10044	2211	81	40	323	18103	10.9	13	40	63	201	22.2	155	28		Bakong	Long building along the causeway	2.49	<LOD	349	<LOD	19024	12804	3569	102	90	672	29781	10.5	17	63	64.2	172	22.7	231	7
Baphuon	Middle gallery	2.44	<LOD	680	260	13927	12454	2530	97	60	801	21103	7.6	13	70	58.2	186	19.2	138	22		Bakong	Long building along the causeway	1.9	<LOD	1227	<LOD	18177	10747	3195	167	84	783	26597	10.7	13	62	62.2	255	18.3	227	6
Baphuon	Middle gallery	2.78	<LOD	337	122	12665	9219	2941	81	216	796	23385	10.2	18	77	54.3	184	19.2	159	18		Bakong	Long building along the causeway	1.74	<LOD	856	682	20902	11678	3510	125	67	647	28011	13.7	11	63	78.8	184	22.8	284	12
Baphuon	Middle gallery	3.04	<LOD	1352	<LOD	16448	10435	2285	162	40	432	16645	12.3	14	71	71.1	234	22.3	139	72		Bakong	Long building along the causeway	1.22	<LOD	384	463	23548	22787	3847	246	73	616	27482	12.4	10	58	79.3	182	19	237	14
Baphuon	Middle gallery	3.27	<LOD	773	277	12845	9739	3155	226	69	2195	22342	7.6	20	111	57.2	226	16.8	181	25		Bakong	Long building along the causeway	2.15	<LOD	743	376	18635	11717	3453	189	76	859	25603	11.9	13	57	74	197	23	242	10
Baphuon	Middle gallery	3.44	<LOD	2792	114	14725	19596	3184	134	88	763	24844	16.3	16	69	57	188	22.6	275	6.3		Bakong	Long building along the causeway	3.71	<LOD	504	<LOD	19028	10585	3401	240	87	671	29202	13.6	17	59	66.2	334	19	287	11
Baphuon	Middle gallery	2.57	<LOD	752	213	11375	11550	3373	116	80	915	41132	16	23	83	45.7	171	34	209	11		Bakong	Long building along the causeway	1.09	<LOD	609	<LOD	19360	10007	3306	152	74	709	26980	11.4	20	62	66.2	259	18.3	300	11
Baphuon	Middle gallery	1.1	<LOD	<LOD	182	14582	9369	2800	125	64	618	25367	9.6	15	54	56.7	203	28.4	156	53		Bakong	Long building along the causeway	1.41	1083	491	162	19938	9942	3678	333	75	677	28948	14.8	14	71	77.1	185	18.8	200	17
North Khleang	Wall	1.13	1746	1734	<LOD	13305	12663	2482	86	61	408	21218	10.7	16	45	57.9	190	19.3	183	13		Bakong	Long building along the causeway	2.61	<LOD	<LOD	157	18131	10307	3225	150	60	648	27840	13.4	11	70	67.5	240	19.1	274	11
North Khleang	Wall	2.21	<LOD	1361	157	15349	9783	2550	78	45	315	20220	12.8	12	35	61.7	229	18.4	156	19		Bakong	Long building along the causeway	2.12	<LOD	742	108	17245	11159	3328	258	71	945	25771	7.8	12	58	55.5	263	18.9	237	10
North Khleang	Wall	1.41	<LOD	1042	157	16999	10137	2571	57	52	390	22667	12.7	16	45	66.6	197	18.3	181	15		Bakong	Central sanctuary	1.19	<LOD	555	<LOD	20854	9968	3875	143	97	885	29260	15.2	16	94	73.9	172	21.9	247	13
North Khleang	Wall	1.31	<LOD	737	<LOD	16051	13482	2857	85	66	495	26752	11.7	15	59	71.5	193	23.9	188	31		Bakong	Central sanctuary	1.59	<LOD	2677	548	17811	11361	2788	113	52	540	24911	15	17	82	76	176	23	267	27
North Khleang	Wall	2.24	1678	1556	377	12119	15382	2467	85	54	407	20109	9.9	608	312	55.6	195	18.2	179	13		Bakong	Central sanctuary	4.23	<LOD	465	170	17985	10222	3659	151	64	1187	29065	15.5	13	101	67	195	22	320	19
South Khleang	Wall	2.05	<LOD	541	<LOD	17049	8480	2107	170	27	344	18046	10.1	13	40	61.8	205	11.1	100.8	11.1		Bakong	Central sanctuary	4.78	<LOD	<LOD	<LOD	15142	10119	3921	117	68	703	27905	17.5	18	68	69.1	183	20.2	308	22
South Khleang	Wall	2.57	<LOD	1021	<LOD	15056	10703	2638	123	62	398	21039	10.4	39	48	54.8	225	18.6	200	11		Bakong	Central sanctuary	4.66	<LOD	348	147	14017	11197	3538	158	64	592	25422	13.1	19	59	59.4	195	25.8	331	21
South Khleang	Wall	2.77	1436	741	259	16583	9527	2737	122	65	365	20568	11.1	2201	1097	55.6	240	17.3	194	14		Bakong	Central sanctuary	0.87	1633	814	358	16837	12000	3071	104	77	593	24638	17	17	61	68.8	167	22.7	273	14
South Khleang	Wall	1.92	939	840	224	17684	9632	2818	119	54	393	22414	6.9	1904	943	56	262	17.3	173	4.3		Bakong	Central sanctuary	1.53	<LOD	1963	677	17052	10450	2608	80	50	520	20766	9.9	16	108	65.3	205	19.5	202	24
South Khleang	Wall	2.15	<LOD	2203	583	13348	9562	3343	473	80	602	22614	10.2	3919	1926	52	257	124	179	13		Bakong	Central sanctuary	2.55	<LOD	406	397	17223	9409	2762	131	58	1245	23410	11.7	13	64	67	180	19.8	192	24
Angkor Wat	Outer gallery	4.91	<LOD	<LOD	449	19229	11544	2717	93	40	470	22988	12.8	13	95	69.9	217	22.3	246	17		Bakong	Central sanctuary	0.88	<LOD	<LOD	<LOD	18251	9080	2545	82	41	599	21591	15.7	18	53	67.1	210	15.1	179	42
Angkor Wat	Outer gallery	2.96	<LOD	<LOD	261	17076	9236	2904	83	60	469	26073	13.3	423	327	66.3	199	19.4	257	16
Angkor Wat	Outer gallery	5.11	1253	624	<LOD	17199	9654	2745	106	64	513	24556	8.9	1007	573	61.8	207	19.7	272	34
Angkor Wat	Outer gallery	1.63	<LOD	503	300	21113	9661	2886	129	90	604	29093	16	1322	738	78.7	185	21.1	240	17
Angkor Wat	Outer gallery	3.82	<LOD	<LOD	337	17922	10145	2631	91	47	407	23376	13.7	266	223	67.3	216	18.3	237	9.4
Angkor Wat	Middle gallery	2.32	1772	817	207	14917	18360	3026	193	67	435	22577	12.4	662	597	56.2	315	20.5	274	6
Angkor Wat	Middle gallery	1.9	<LOD	434	149	18933	9652	2944	88	61	794	25338	14.6	14	123	73.2	188	19.1	180	6
Angkor Wat	Middle gallery	4.62	<LOD	330	482	19819	10560	3644	150	165	706	29141	9.7	15	99	69.6	230	21.9	394	16
Angkor Wat	Middle gallery	3.92	<LOD	<LOD	181	18229	10175	3170	104	57	483	28478	16.1	12	62	71.4	175	21.8	298	107
Angkor Wat	Middle gallery	3.45	<LOD	388	628	19920	9243	2954	120	67	509	24694	13.1	13	48	75.4	194	20.5	235	19
